# Supplementary material
Source: PubMed Central journal article supplement (PMC7611586)
Supplement: EMS127176-supplement-Sup_Figures123.pdf [file EMS127176-supplement-Sup_Figures123.pdf]

# Supplementary Figure 1

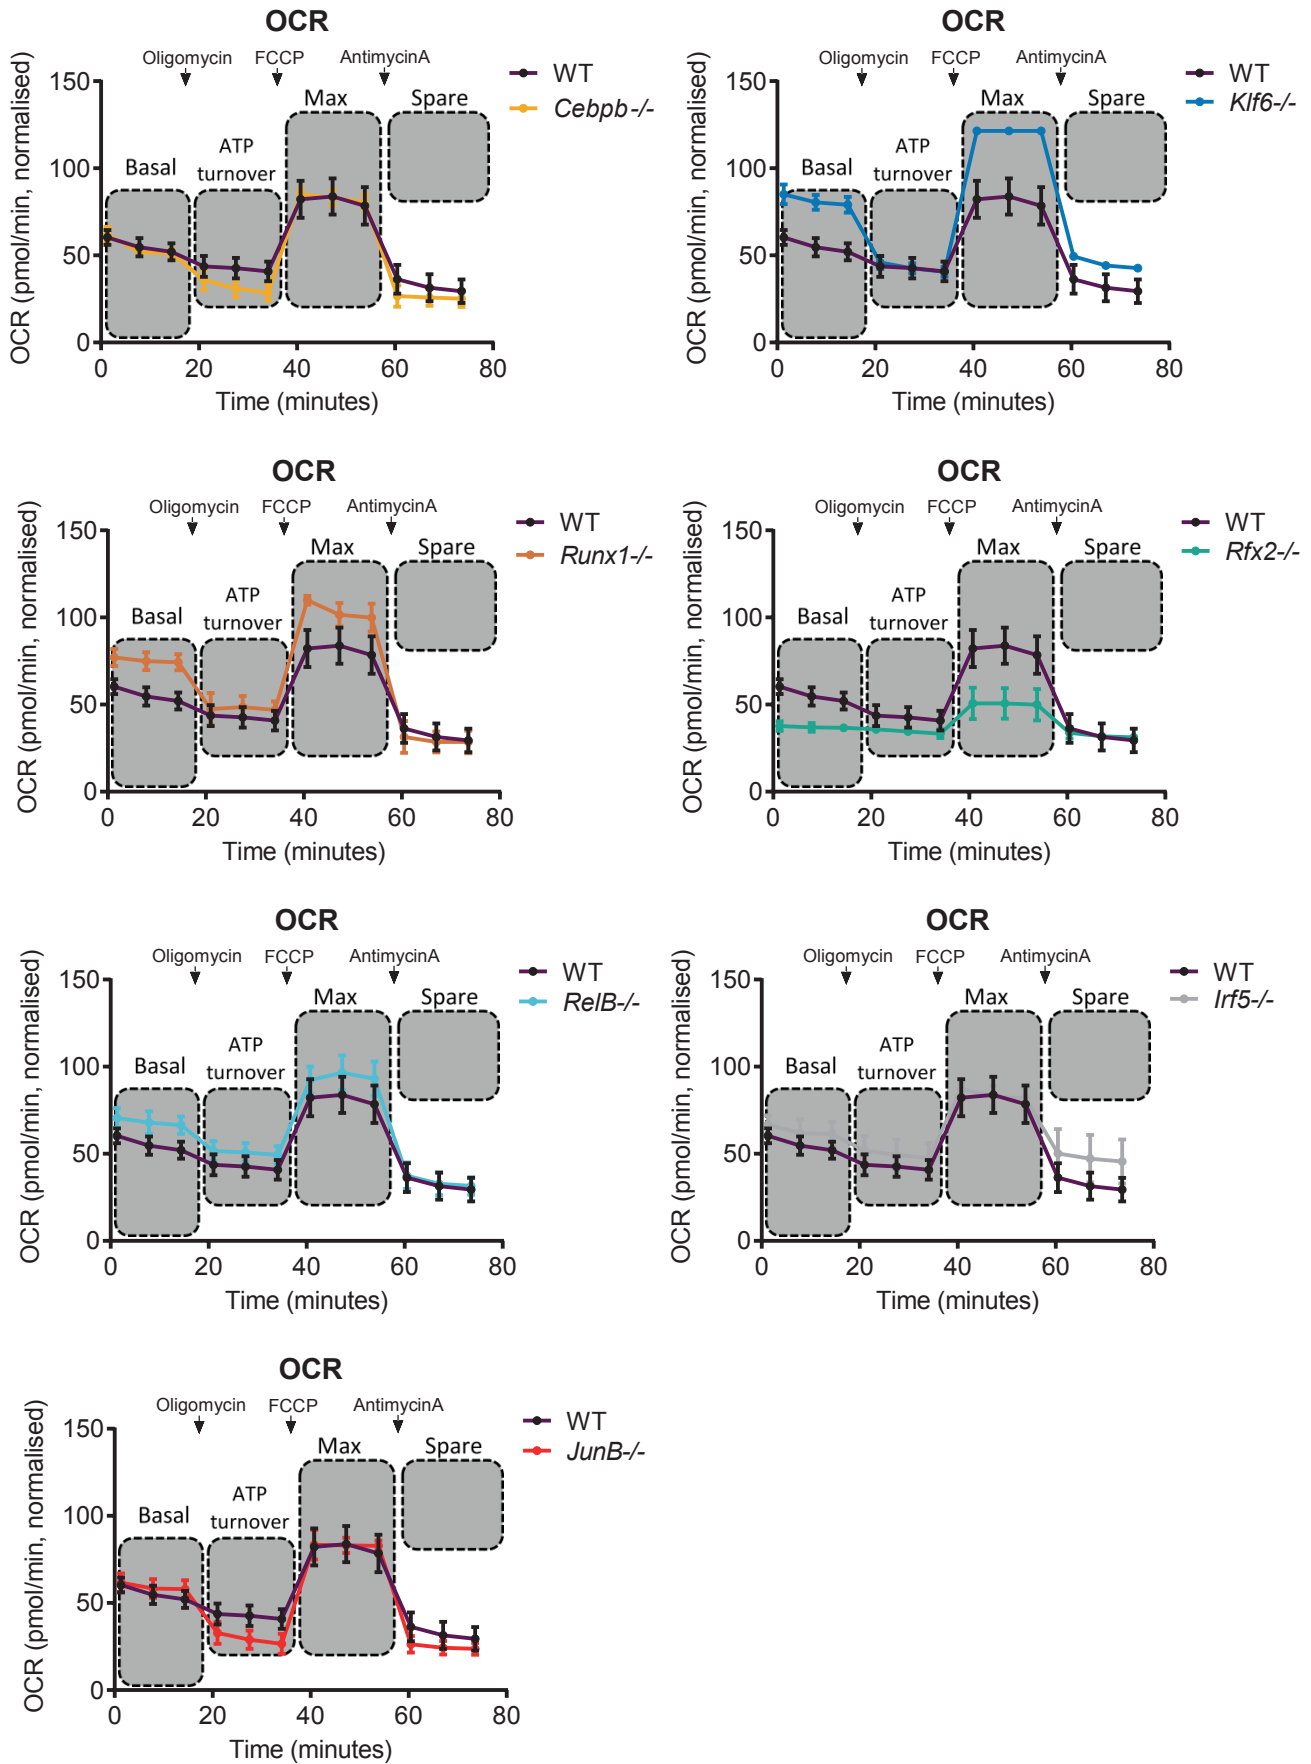

## Supplementary Fig. 1 Oxygen consumption and apoptosis of HoxB8 neutrophils.

Oxygen consumption rates (OCRs) were measured over 80 minutes for WT and indicated KO HoxB8 neutrophils. Data are shown as means and SD from three independent experiments, each with four technical replicates.

## Supplementary Figure 2

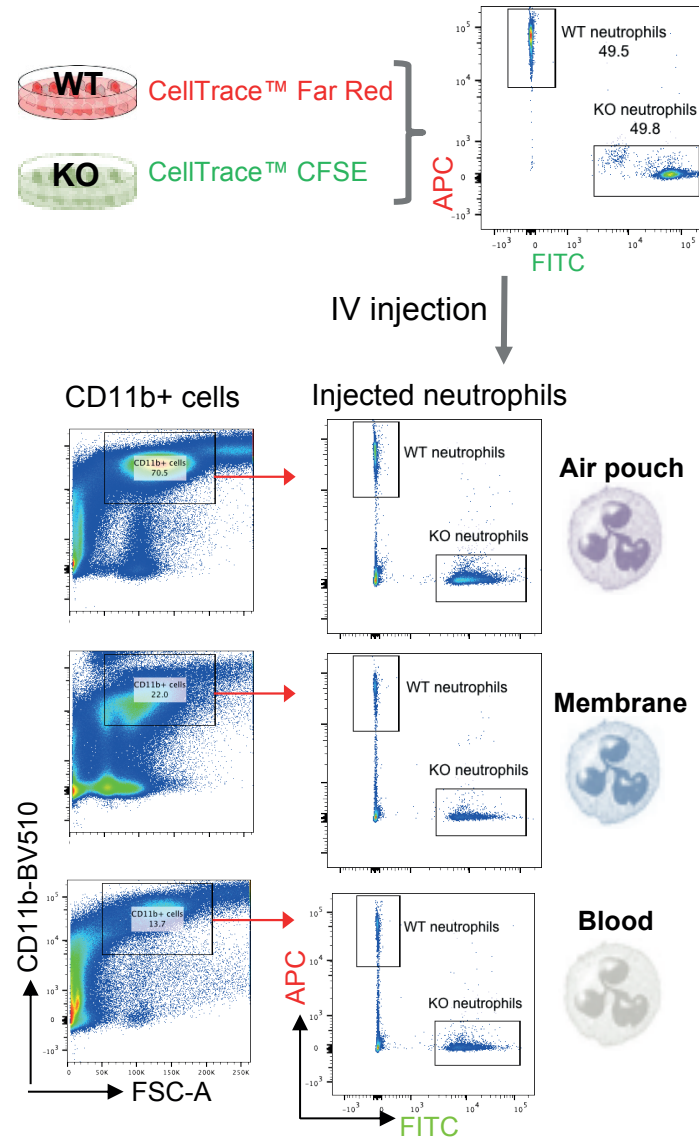

**Supplementary Fig. 2 Gating strategy to recover differentially labelled HoxB8 neutrophils after adoptive transfer of HoxB8 neutrophils into mice subjected to air pouch model of acute inflammation and zymosan stimulation.**

## Supplementary Figure 3

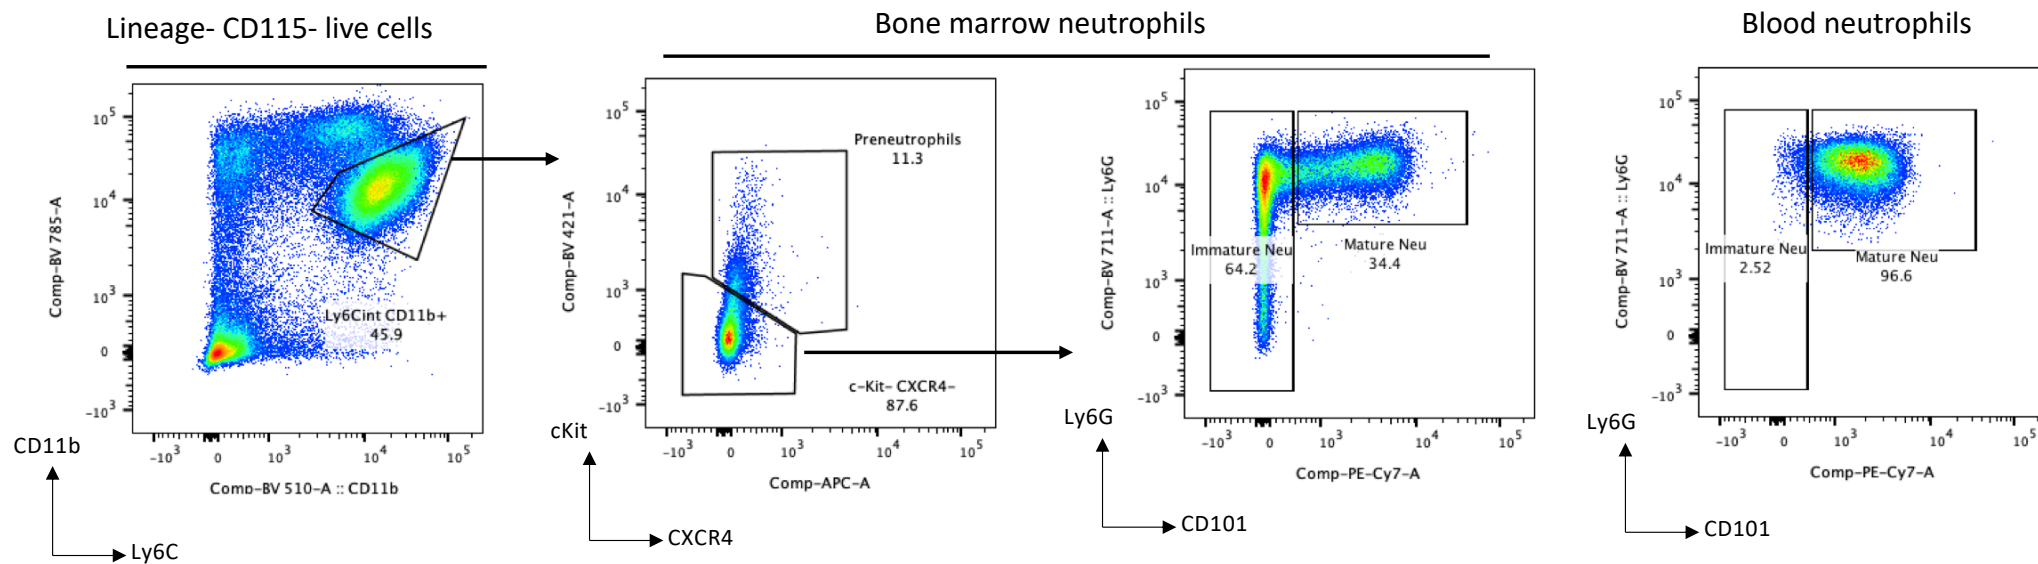

**Supplementary Fig. 3 FACs gating strategy to segregate preneutrophils, immature and mature neutrophils in the bone marrow and the blood.**
