# Supplementary material
Source: PubMed Central journal article supplement (PMC7611586)

# JUNB Western Blot (Extended Data Figure 4d)

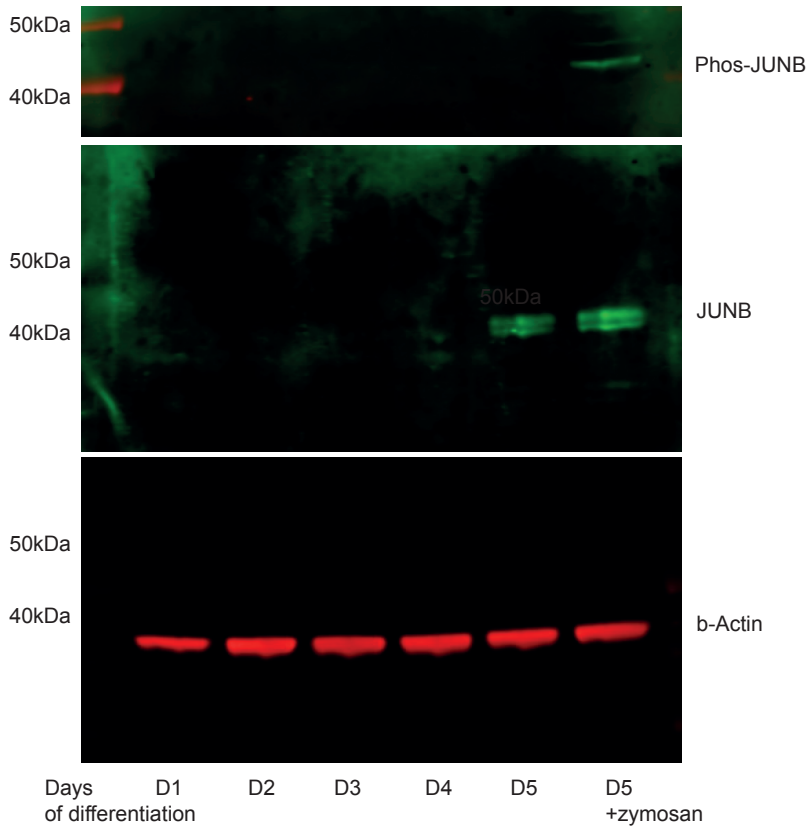

Supplement: EMS127176-supplement-ED_Fig4D_WB_source.pdf [file EMS127176-supplement-ED_Fig4D_WB_source.pdf]

**WB knockout (KO) validation (Extended Data Figure 5a)**

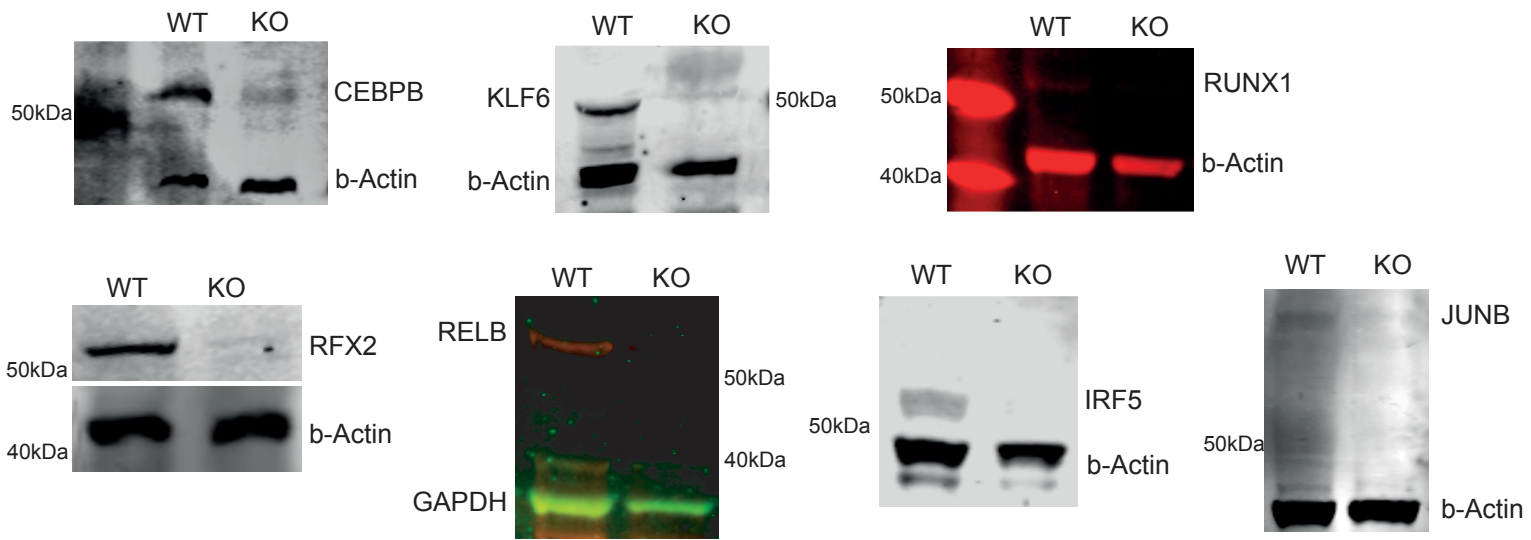

**MPO Western Blot (Extended Data Figure 5c)**

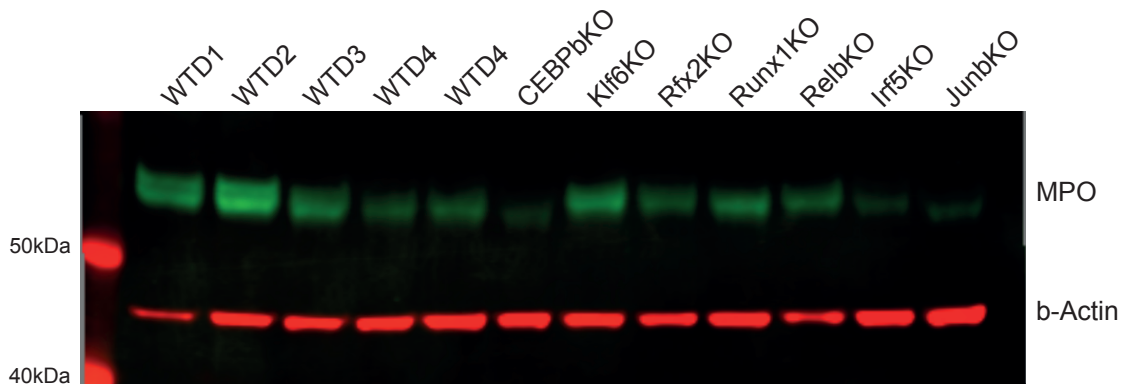

Supplement: EMS127176-supplement-ED_Fig5A_WB_source.pdf [file EMS127176-supplement-ED_Fig5A_WB_source.pdf]

**LaminB2 Western Blot (Figure 3d)**

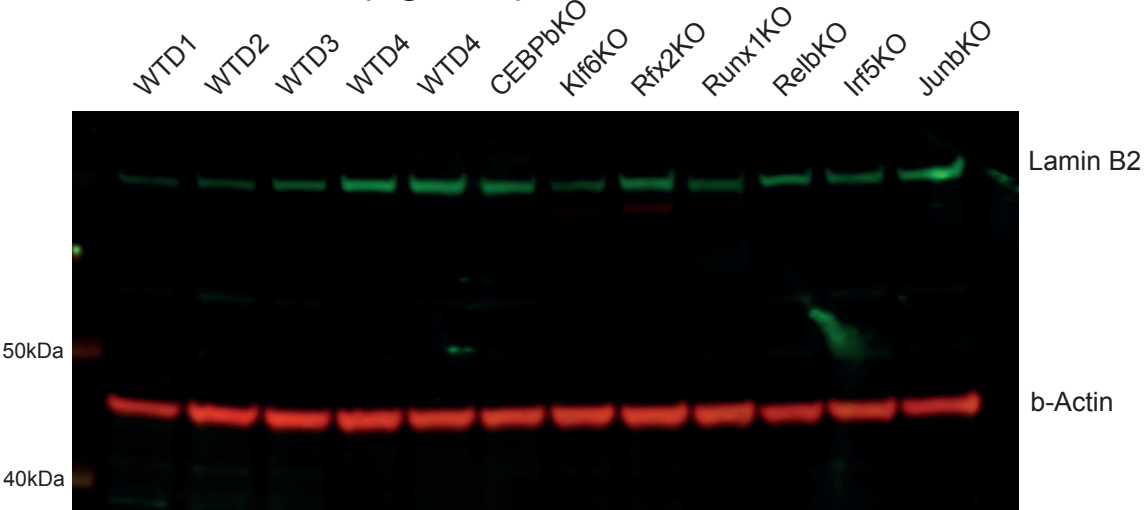

Supplement: EMS127176-supplement-Fig3D_WB_source.pdf [file EMS127176-supplement-Fig3D_WB_source.pdf]
